# Supplementary material for: Syntheses, structures and theoretical investigations of [Au10S2(PPh2)2(dppma2)4(dppma3)]·[Au6S2(dppma2)2(dppma3)]
Source: Royal Society of Chemistry journal article supplement (doi:10.1039/c5dt01360g), 2015-01-01
Supplement: c5dt01360g1.pdf [file c5dt01360g1.pdf]

### Electronic Supplementary Information

## Syntheses, structures and theoretical investigations of [Au<sub>10</sub>S<sub>2</sub>(PPh<sub>2</sub>)<sub>2</sub>(dppma2)<sub>4</sub>(dppma3)]·[Au<sub>6</sub>S<sub>2</sub>(dppma2)<sub>2</sub>(dppma3)]

Wen Yu<sup>a,b</sup>, Lukas Guggolz<sup>b</sup>, Stefanie Dehnen<sup>b</sup>, Olaf Fuhr<sup>c,d</sup> and Dieter Fenske<sup>a,c,d</sup>

<sup>a</sup> Institut für Anorganische Chemie, Karlsruher Institut für Technologie (KIT), Engesserstrasse 15, 76131 Karlsruhe, Germany.

<sup>b</sup> Philipps-Universität Marburg, Fachbereich Chemie and Wissenschaftliches Zentrum für Materialwissenschaften (WZMW), Hans-Meerwein-Straße, D-35043 Marburg, Germany.  
E-mail: dehnen@chemie-uni-marburg.de; Fax: +49 6421 2825653; Tel: +49 6421 2825751.

<sup>c</sup> Institut für Nanotechnologie (INT) and Karlsruher Nano-Micro-Facility (KNMF), Karlsruher Institut für Technologie (KIT), Hermann-von-Helmholtz-Platz 1, 76344 Eggenstein-Leopoldshafen.

<sup>d</sup> Lehn Institute of Functional Materials (LIFM), Sun Yat-Sen University, 135 Xingang Road West, Guangzhou 510275, China.

## 1. Synthesis details

### 1.1 Materials and reagents

The ligand 2,3-bis(diphenylphosphino)maleic anhydride (dppma)<sup>[1]</sup>, the binuclear gold(I) chloride precursors, [(AuCl)<sub>2</sub>(dppma)],<sup>[2]</sup> and S(SiMe<sub>3</sub>)<sub>2</sub><sup>[3]</sup> were synthesized according to literature procedures. All solvents were purified and distilled in a nitrogen atmosphere using standard procedures prior to use.

### 1.2 Synthesis of **1**

To a suspension of [(AuCl)<sub>2</sub>(dppma)] (158 mg, 0.17 mmol) in CH<sub>2</sub>Cl<sub>2</sub> (10 ml) with a drop of water S(SiMe<sub>3</sub>)<sub>2</sub> (0.042 ml, 0.20 mmol) was added. The reaction mixture immediately turned dark and was stirred for one hour at room temperature. Layering *n*-heptane onto the solution gave three kinds of crystalline products (yields given with respect to Au): yellow needle-like [Au<sub>5</sub>(PPh<sub>2</sub>)<sub>3</sub>(dppma<sub>2</sub>)<sub>2</sub>] (about 40% yield) and red cube-like [Au<sub>24</sub>(PPh<sub>2</sub>)<sub>4</sub>S<sub>6</sub>(dppma<sub>2</sub>)<sub>8</sub>] (about 35% yield) beside a very small amount (ca. 8 mg, about 5% yield) of dark-orange, needle-like crystals of [Au<sub>10</sub>S<sub>2</sub>(PPh<sub>2</sub>)<sub>2</sub>(dppma<sub>2</sub>)<sub>4</sub>(dppma<sub>3</sub>)]·[Au<sub>6</sub>S<sub>2</sub>(dppma<sub>2</sub>)<sub>2</sub>(dppma<sub>3</sub>)] (**1**).

## 2. Details of the X-ray diffraction measurements, structure solutions and refinements

*Crystal structure determination.* The X-ray diffraction data of **1** were collected at 150 K on a STOE StadiVari diffractometer with a Pilatus300K detector using a Mo GeniX 3D HF micro focus X-ray source ( $\lambda = 0.71073 \text{ \AA}$ ). The structure was solved by direct methods; full-matrix least-squares refinement on  $F^2$  was done by using the program packages SHELX<sup>[4]</sup> and OLEX2.<sup>[5]</sup> H atoms were added on idealized positions. The crystallographic data for compound **1** are summarized in Table S1.

**Table S1.** Crystallographic data for **1**

|                                             |                                                                |
|---------------------------------------------|----------------------------------------------------------------|
| CCDC Depository number                      | 1046523                                                        |
| Formula weight                              | 7246.05                                                        |
| Temperature/K                               | 150.15                                                         |
| Crystal system                              | triclinic                                                      |
| Space group                                 | $P\bar{1}$                                                     |
| a/Å                                         | 15.4644(3)                                                     |
| b/Å                                         | 25.0982(5)                                                     |
| c/Å                                         | 27.0905(4)                                                     |
| $\alpha$ /°                                 | 92.1940(10)                                                    |
| $\beta$ /°                                  | 91.0980(10)                                                    |
| $\gamma$ /°                                 | 93.1300(10)                                                    |
| Volume/Å <sup>3</sup>                       | 10488.8(3)                                                     |
| Z                                           | 2                                                              |
| $\rho_{\text{calc}}/\text{gcm}^{-3}$        | 2.294                                                          |
| $\mu/\text{mm}^{-1}$                        | 11.596                                                         |
| F(000)                                      | 6740.0                                                         |
| Crystal size/mm <sup>3</sup>                | 0.25 × 0.14 × 0.08                                             |
| Radiation                                   | MoK $\alpha$ ( $\lambda = 0.71073$ )                           |
| 2 $\Theta$ range for data collection/°      | 3.01 to 52.2                                                   |
| Index ranges                                | $-19 \leq h \leq 18, -30 \leq k \leq 31, -33 \leq l \leq 31$   |
| Reflections collected                       | 79203                                                          |
| Independent reflections                     | 40454 [ $R_{\text{int}} = 0.0653, R_{\text{sigma}} = 0.0644$ ] |
| Data/restraints/parameters                  | 40454/13/2266                                                  |
| Goodness-of-fit on F <sup>2</sup>           | 0.976                                                          |
| Final R indexes [ $I > 2\sigma(I)$ ]        | $R_1 = 0.0634, wR_2 = 0.1669$                                  |
| Final R indexes [all data]                  | $R_1 = 0.0779, wR_2 = 0.1770$                                  |
| Largest diff. peak/hole / e Å <sup>-3</sup> | 4.41/-3.99                                                     |

### 3. Density functional theory (DFT) calculations

#### 3.1 General procedure

Before the quantum chemical investigations could be performed properly, the complex had to be transformed to point group  $C_2$ . Symmetrization was realized by employment of the DIAMOND 3 software<sup>[6]</sup> (to delete one half of the molecule) and addition of the missing half within the DEFINE routine of the program system TURBOMOLE V6.5.<sup>[7]</sup>

Then three single runs of TURBOMOLE's RIDFT program<sup>[8]</sup> were performed with the specifications shown below to obtain an initial guess of the wave function.

The next step was the actual geometry optimization with TURBOMOLE V6.5 using the RIDFT program with the functional B97-D<sup>[9]</sup> (grid size m3). Dispersion correction was performed via Grimme's DFT-D3<sup>[10]</sup> with BJ-damping.<sup>[11]</sup> The used basis sets were of the quality def2-TZVP (Triple-Zeta Valence Plus Polarization)<sup>[12]</sup> with an effective core potential at the Au atoms (au def-ecp).<sup>[13]</sup>

For further investigations Mulliken,<sup>[14]</sup> NPA,<sup>[15]</sup> and PABOON<sup>[16]</sup> analyses, as well as a Boys localization of the molecular orbitals,<sup>[17]</sup> were performed as implemented in TURBOMOLE V6.5.

The bond lengths and angles after the calculations were analyzed with the program Molden.<sup>[18]</sup> The molecular structure was illustrated by employment of DIAMOND 3; pictures of the MOs and LMOs were realized with gOpenMol 3.00 (contour values:  $\pm 0.033$  a.u.).<sup>[19]</sup>

### ***3.2 Intramolecular Au-P and Au-S bond lengths and the respective angles***

The following tables show the calculated bond lengths and angles in comparison to the experimentally obtained values. Due to the calculation in  $C_2$  symmetry opposing bond lengths and angles become equivalent.

**Table S2.** Comparison of experimentally found *versus* calculated Au-P bond lengths within the two types of cluster subunits.

|                                                                                                           | Crystal Structure / Å | Calculated Structure / Å |
|-----------------------------------------------------------------------------------------------------------|-----------------------|--------------------------|
| [Au <sub>10</sub> S <sub>2</sub> (PPh <sub>2</sub> ) <sub>2</sub> (dppma2) <sub>4</sub> (dppma3)] subunit |                       |                          |
| Au(1)–P(2)                                                                                                | 2.276(3)              | 2.307                    |
| Au(6)–P(7)                                                                                                | 2.285(3)              |                          |
| Au(2)–P(1)                                                                                                | 2.279(3)              | 2.299                    |
| Au(7)–P(6)                                                                                                | 2.279(3)              |                          |
| Au(3)–P(4)                                                                                                | 2.258(3)              | 2.269                    |
| Au(8)–P(5)                                                                                                | 2.253(3)              |                          |
| Au(4)–P(3)                                                                                                | 2.276(3)              | 2.292                    |
| Au(9)–P(8)                                                                                                | 2.274(4)              |                          |
| Au(5)–P(2)                                                                                                | 2.290(3)              | 2.308                    |
| Au(10)–P(7)                                                                                               | 2.285(3)              |                          |
| [Au <sub>6</sub> S <sub>4</sub> (dppma2) <sub>2</sub> (dppma3)] subunit                                   |                       |                          |
| Au(12)–P(11)                                                                                              | 2.284(3)              | 2.302                    |
| Au(16)–P(12)                                                                                              | 2.274(3)              |                          |
| Au(13)–P(9)                                                                                               | 2.278(3)              | 2.299                    |
| Au(15)–P(10)                                                                                              | 2.281(3)              |                          |

**Table S3.** Comparison of experimentally found *versus* calculated Au–S bond lengths within the two types of cluster subunits.

|                                                                                                            | Crystal Structure / Å | Calculated Structure / Å |
|------------------------------------------------------------------------------------------------------------|-----------------------|--------------------------|
| [Au <sub>10</sub> S <sub>2</sub> (PPh <sub>2</sub> ) <sub>2</sub> (dppma2) <sub>4</sub> (dppma3)] subunits |                       |                          |
| Au(1)–S(1)                                                                                                 | 2.324(3)              | 2.371                    |
| Au(6)–S(5)                                                                                                 | 2.339(4)              |                          |
| Au(2)–S(3)                                                                                                 | 2.335(3)              | 2.378                    |
| Au(7)–S(4)                                                                                                 | 2.339(3)              |                          |
| Au(3)–S(3)                                                                                                 | 2.322(3)              | 2.361                    |
| Au(8)–S(4)                                                                                                 | 2.318(3)              |                          |
| Au(4)–S(3)                                                                                                 | 2.331(3)              | 2.356                    |
| Au(9)–S(4)                                                                                                 | 2.317(3)              |                          |
| Au(5)–S(2)                                                                                                 | 2.312(3)              | 2.354                    |
| Au(10)–S(6)                                                                                                | 2.305(3)              |                          |
| [Au <sub>6</sub> S <sub>4</sub> (dppma2) <sub>2</sub> (dppma3)] subunit                                    |                       |                          |

|              |          |       |
|--------------|----------|-------|
| Au(11)–S(7)  | 2.283(3) |       |
| Au(14)–S(8)  | 2.282(3) | 2.308 |
| Au(11)–S(9)  | 2.308(3) |       |
| Au(14)–S(10) | 2.304(3) | 2.338 |
| Au(12)–S(9)  | 2.328(3) |       |
| Au(16)–S(10) | 2.313(3) | 2.356 |
| Au(13)–S(9)  | 2.335(3) |       |
| Au(15)–S(10) | 2.336(3) | 2.375 |

**Table S4.** Comparison of experimentally found *versus* calculated S–Au–P and S–Au–S angles within the two types of cluster subunits.

|                                                                                                                                      | Crystal Structure / ° | Calculated Structure / ° |
|--------------------------------------------------------------------------------------------------------------------------------------|-----------------------|--------------------------|
| [Au <sub>10</sub> S <sub>2</sub> (PPh <sub>2</sub> ) <sub>2</sub> (dppma <sub>2</sub> ) <sub>4</sub> (dppma <sub>3</sub> )] subunits |                       |                          |
| S(1)–Au(1)–P(2)                                                                                                                      | 170.4(1)              |                          |
| S(5)–Au(6)–P(7)                                                                                                                      | 166.1(1)              | 168.8                    |
| S(3)–Au(2)–P(1)                                                                                                                      | 173.7(1)              |                          |
| S(4)–Au(7)–P(6)                                                                                                                      | 172.5(1)              | 177.2                    |
| S(3)–Au(3)–P(4)                                                                                                                      | 170.1(1)              |                          |
| S(4)–Au(8)–P(5)                                                                                                                      | 168.5(1)              | 164.6                    |
| S(3)–Au(4)–P(3)                                                                                                                      | 170.5(1)              |                          |
| S(4)–Au(9)–P(8)                                                                                                                      | 175.2(1)              | 176.7                    |
| S(2)–Au(5)–P(2)                                                                                                                      | 176.1(1)              |                          |
| S(6)–Au(10)–P(7)                                                                                                                     | 173.6(1)              | 175.5                    |
| [Au <sub>6</sub> S <sub>4</sub> (dppma <sub>2</sub> ) <sub>2</sub> (dppma <sub>3</sub> )] subunit                                    |                       |                          |
| S(9)–Au(12)–P(11)                                                                                                                    | 162.5(1)              |                          |
| S(10)–Au(16)–P(12)                                                                                                                   | 167.3(1)              | 167.4                    |
| S(9)–Au(13)–P(9)                                                                                                                     | 171.6(1)              |                          |
| S(10)–Au(15)–P(10)                                                                                                                   | 170.2(1)              | 172.8                    |
| S(7)–Au(11)–S(9)                                                                                                                     | 171.2(1)              |                          |
| S(8)–Au(14)–S(10)                                                                                                                    | 170.1(1)              | 170.9                    |

### 3.3 Calculated Au-Au distances

Table S5 shows the calculated and the experimentally obtained Au...Au distances. Due to the calculation in  $C_2$  symmetry opposing gold-gold distances become equivalent.

See also Table S6 for an investigation of possible aurophilic interactions.

**Table S5.** Comparison of experimentally found *versus* calculated Au...Au distances within the two types of cluster subunits.

|                                                                                                           | Crystal Structure / Å | Calculated Structure / Å |
|-----------------------------------------------------------------------------------------------------------|-----------------------|--------------------------|
| [Au <sub>10</sub> S <sub>2</sub> (PPh <sub>2</sub> ) <sub>2</sub> (dppma2) <sub>4</sub> (dppma3)] subunit |                       |                          |
| Au(1)...Au(2)                                                                                             | 2.912(1)              | 2.965                    |
| Au(6)...Au(7)                                                                                             | 2.891(1)              |                          |
| Au(2)...Au(3)                                                                                             | 3.124(1)              | 3.124                    |
| Au(7)...Au(8)                                                                                             | 3.047(1)              |                          |
| Au(3)...Au(4)                                                                                             | 3.389(1)              | 3.361                    |
| Au(8)...Au(9)                                                                                             | 3.403(1)              |                          |
| Au(4)...Au(5)                                                                                             | 2.978(1)              | 3.011                    |
| Au(9)...Au(10)                                                                                            | 2.957(1)              |                          |
| [Au <sub>6</sub> S <sub>4</sub> (dppma2) <sub>2</sub> (dppma3)] subunit                                   |                       |                          |
| Au(11)...Au(13)                                                                                           | 3.195(1)              | 3.339                    |
| Au(14)...Au(15)                                                                                           | 3.188(1)              |                          |
| Au(11)...Au(15)                                                                                           | 2.983(1)              | 3.081                    |
| Au(13)...Au(14)                                                                                           | 2.971(1)              |                          |
| Au(12)...Au(15)                                                                                           | 3.154(1)              | 3.348                    |
| Au(13)...Au(16)                                                                                           | 3.338(1)              |                          |
| Au(12)...Au(13)                                                                                           | 3.753(1)              | 3.802                    |
| Au(15)...Au(16)                                                                                           | 3.690(1)              |                          |
| Au(11)...Au(14)                                                                                           | 3.352(1)              | 3.502                    |
| Au(12)...Au(16)                                                                                           | 3.175(1)              | 3.210                    |
| Au(13)...Au(15)                                                                                           | 4.376(1)              | 4.582                    |

### 3.4 Investigation of possible aurophilic interactions

A population analysis based on occupation numbers (PABOON)<sup>T11</sup> was performed to investigate possible Au(I)⋯Au(I) interactions. Since the calculated shared electron numbers (SEN) do not correlate with the observed gold-gold distances, we don't assume the existence of aurophilic interactions within the two complex subunits (see Table S6). Due to the calculation in *C*<sub>2</sub> symmetry opposing gold-gold distances and the corresponding SEN become equivalent.

**Table S6.** Calculated Au⋯Au distances within the two types of cluster subunits and the corresponding SEN values.

|                                                                                                           | Calculated Structure / Å | SEN  |
|-----------------------------------------------------------------------------------------------------------|--------------------------|------|
| [Au <sub>10</sub> S <sub>2</sub> (PPh <sub>2</sub> ) <sub>2</sub> (dppma2) <sub>4</sub> (dppma3)] subunit |                          |      |
| Au(1)⋯Au(2)                                                                                               | 2.965                    | 0.22 |
| Au(6)⋯Au(7)                                                                                               |                          |      |
| Au(2)⋯Au(3)                                                                                               | 3.124                    | 0.49 |
| Au(7)⋯Au(8)                                                                                               |                          |      |
| Au(3)⋯Au(4)                                                                                               | 3.361                    | 0.23 |
| Au(8)⋯Au(9)                                                                                               |                          |      |
| Au(4)⋯Au(5)                                                                                               | 3.011                    | 0.09 |
| Au(9)⋯Au(10)                                                                                              |                          |      |
| [Au <sub>6</sub> S <sub>4</sub> (dppma2) <sub>2</sub> (dppma3)] subunit                                   |                          |      |
| Au(11)⋯Au(13)                                                                                             | 3.339                    | 0.46 |
| Au(14)⋯Au(15)                                                                                             |                          |      |
| Au(11)⋯Au(15)                                                                                             | 3.081                    | 0.56 |
| Au(13)⋯Au(14)                                                                                             |                          |      |
| Au(12)⋯Au(15)                                                                                             | 3.348                    | 0.27 |
| Au(13)⋯Au(16)                                                                                             |                          |      |
| Au(12)⋯Au(13)                                                                                             | 3.802                    | 0.35 |
| Au(15)⋯Au(16)                                                                                             |                          |      |
| Au(11)⋯Au(14)                                                                                             | 3.502                    | 0.36 |
| Au(12)⋯Au(16)                                                                                             | 3.210                    | 0.30 |
| Au(13)⋯Au(15)                                                                                             | 4.582                    | 0.53 |



### 3.5 Intermolecular distances and interactions

Table S7 shows the intermolecular Au $\cdots$ S distances as well as the intermolecular hydrogen bonds. Due to the calculation in  $C_2$  symmetry opposing distances become equivalent.

**Table S7.** Comparison of experimentally found *versus* calculated distances between the two subunits of the complex.

|                                       | Crystal Structure / Å | Calculated Structure / Å |
|---------------------------------------|-----------------------|--------------------------|
| Postulated dipole-dipole interactions |                       |                          |
| Au(3) $\cdots$ S(8)                   | 3.597(1)              | 3.400                    |
| Au(8) $\cdots$ S(7)                   | 3.474(1)              |                          |
| S(3) $\cdots$ Au(11)                  | 4.558(1)              | 4.514                    |
| S(4) $\cdots$ Au(14)                  | 4.589(1)              |                          |
| Au(4) $\cdots$ S(9)                   | 4.143(1)              | 3.733                    |
| Au(9) $\cdots$ S(10)                  | 4.037(1)              |                          |
| Hydrogen bonds                        |                       |                          |
| O(16) $\cdots$ H(57)                  | 2.477(1)              | 2.494                    |
| O(19) $\cdots$ H(60)                  | 2.412(1)              |                          |
| O(6) $\cdots$ H(138)                  | 2.787(1)              | 2.958                    |
| O(15) $\cdots$ H(118)                 | 3.254(1)              |                          |
| O(6) $\cdots$ H(124)                  | 3.000(1)              | 2.629                    |
| O(15) $\cdots$ H(144)                 | 2.439(1)              |                          |
| S(7) $\cdots$ H(57)                   | 2.892(1)              | 3.015                    |
| S(8) $\cdots$ H(60)                   | 2.968(1)              |                          |
| S(7) $\cdots$ H(43)                   | 3.867(1)              | 3.115                    |
| S(8) $\cdots$ H(115)                  | 3.547(1)              |                          |
| S(7) $\cdots$ H(44)                   | 3.832(1)              | 3.290                    |
| S(8) $\cdots$ H(116)                  | 3.464(1)              |                          |

The canonical MOs (Figures S1–S4) and the localized molecular orbitals (LMOs; Figures S5–S8) clearly show that their respective orientations fit well in case of the postulated hydrogen bonds but not in case of the Au $\cdots$ S dipole-dipole interactions.

The H atoms, which are involved in the hydrogen bonds, are encircled. The corresponding canonical MOs and the LMOs are marked with an arrow. In all of the following figures the contour values of the orbitals are  $\pm 0.033$  a.u.

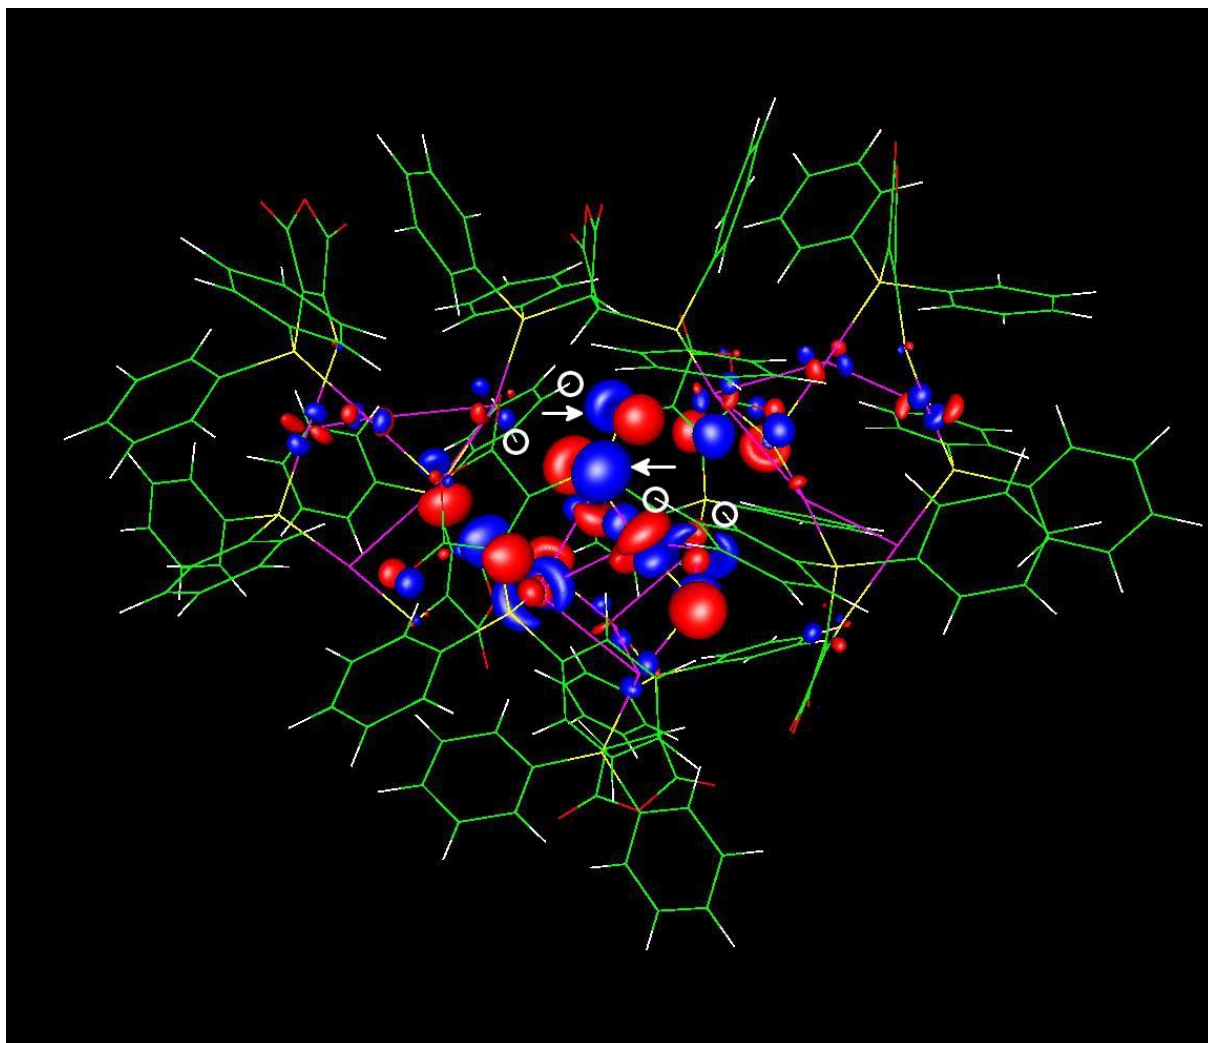

**Figure S1.** HOMO-3, -5.275 eV.

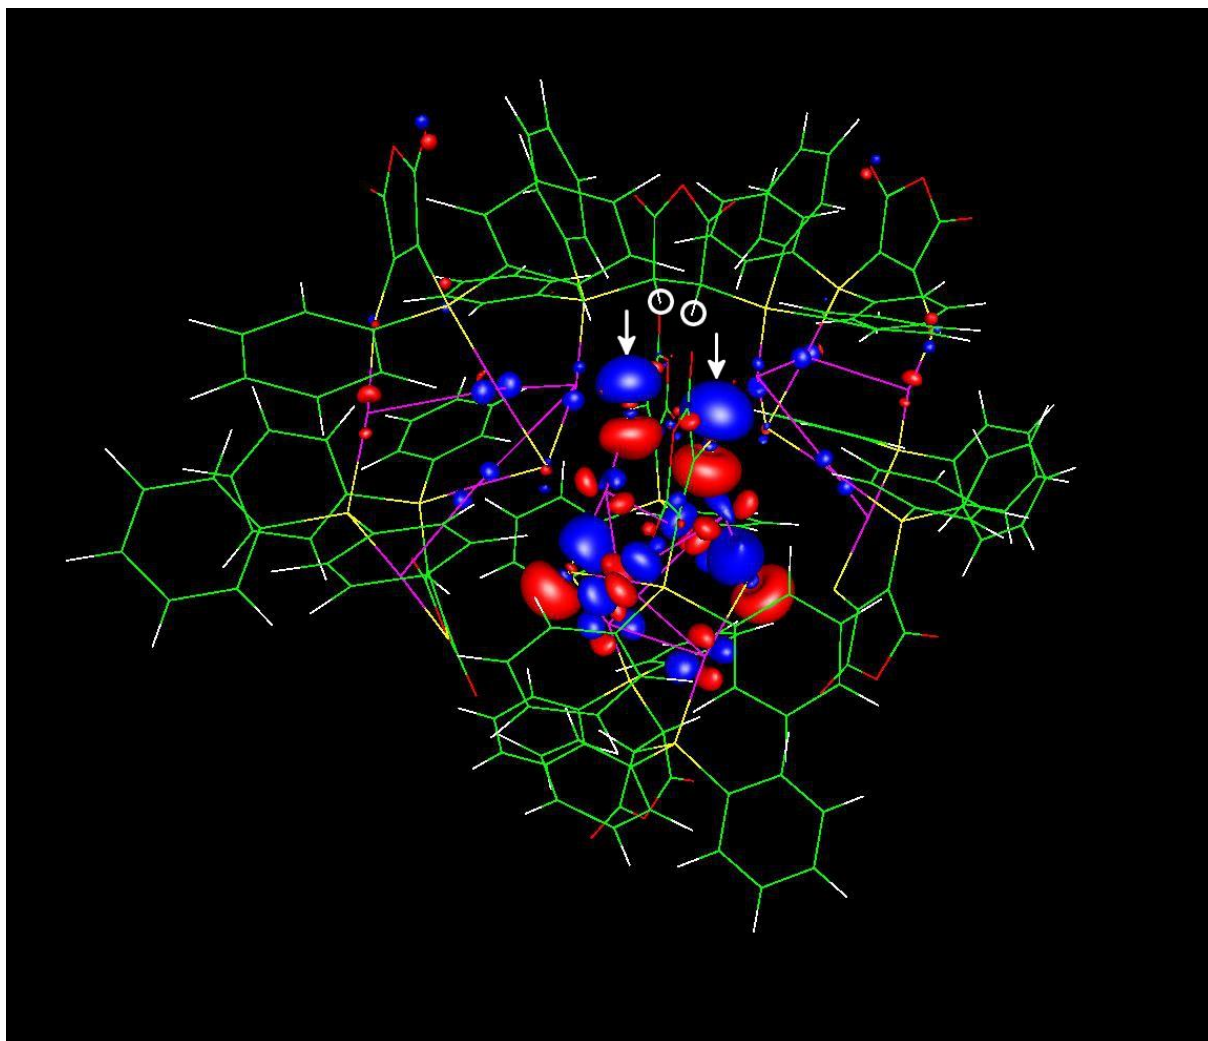

**Figure S2.** HOMO-23, -5.991 eV.

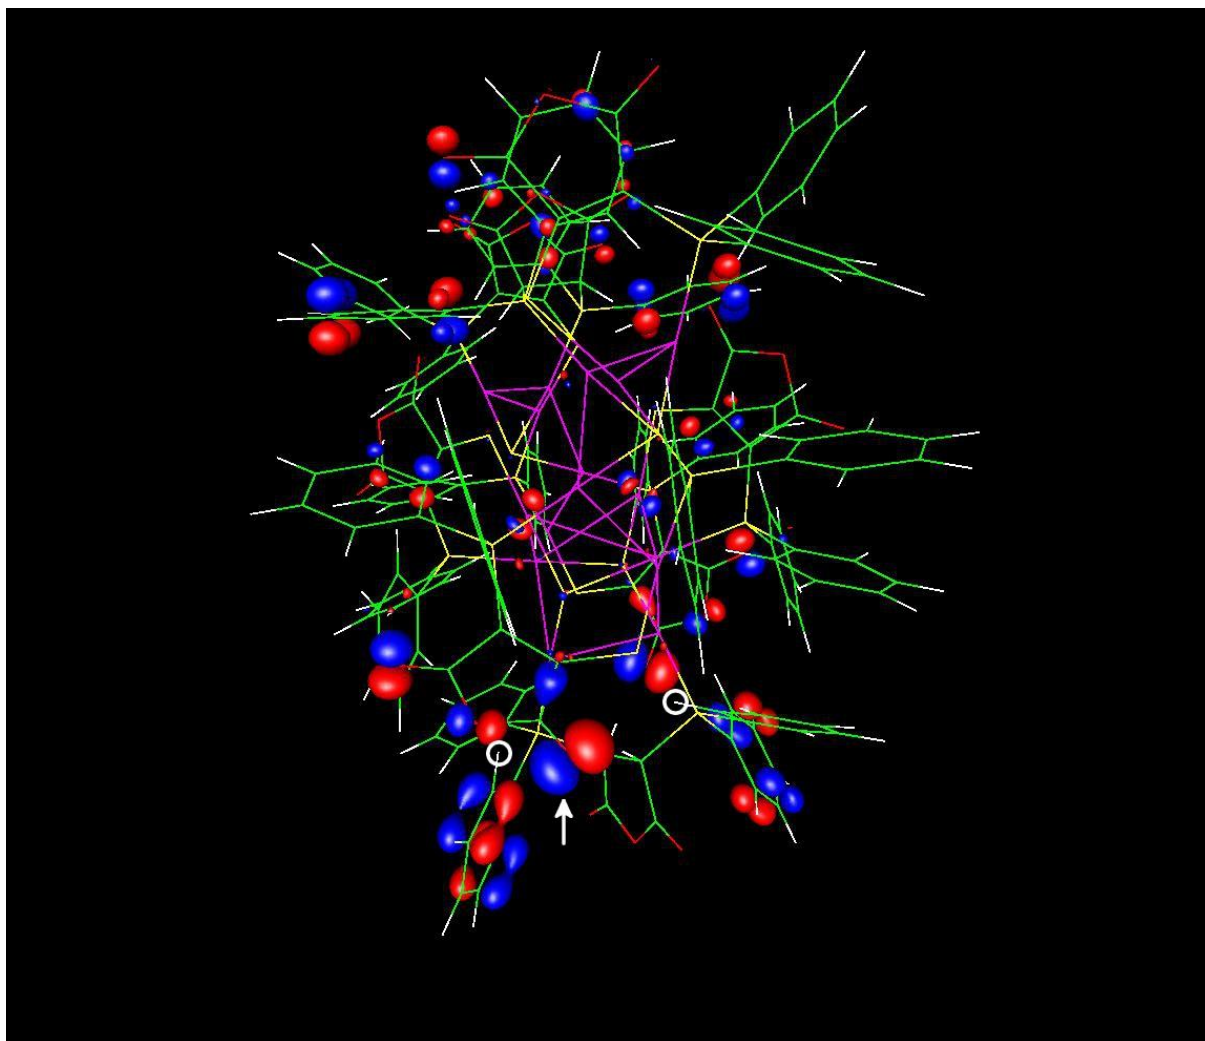

**Figure S3.** HOMO-59, -6.571 eV. The hydrogen bonds on the opposite side of the complex are omitted for clarity.

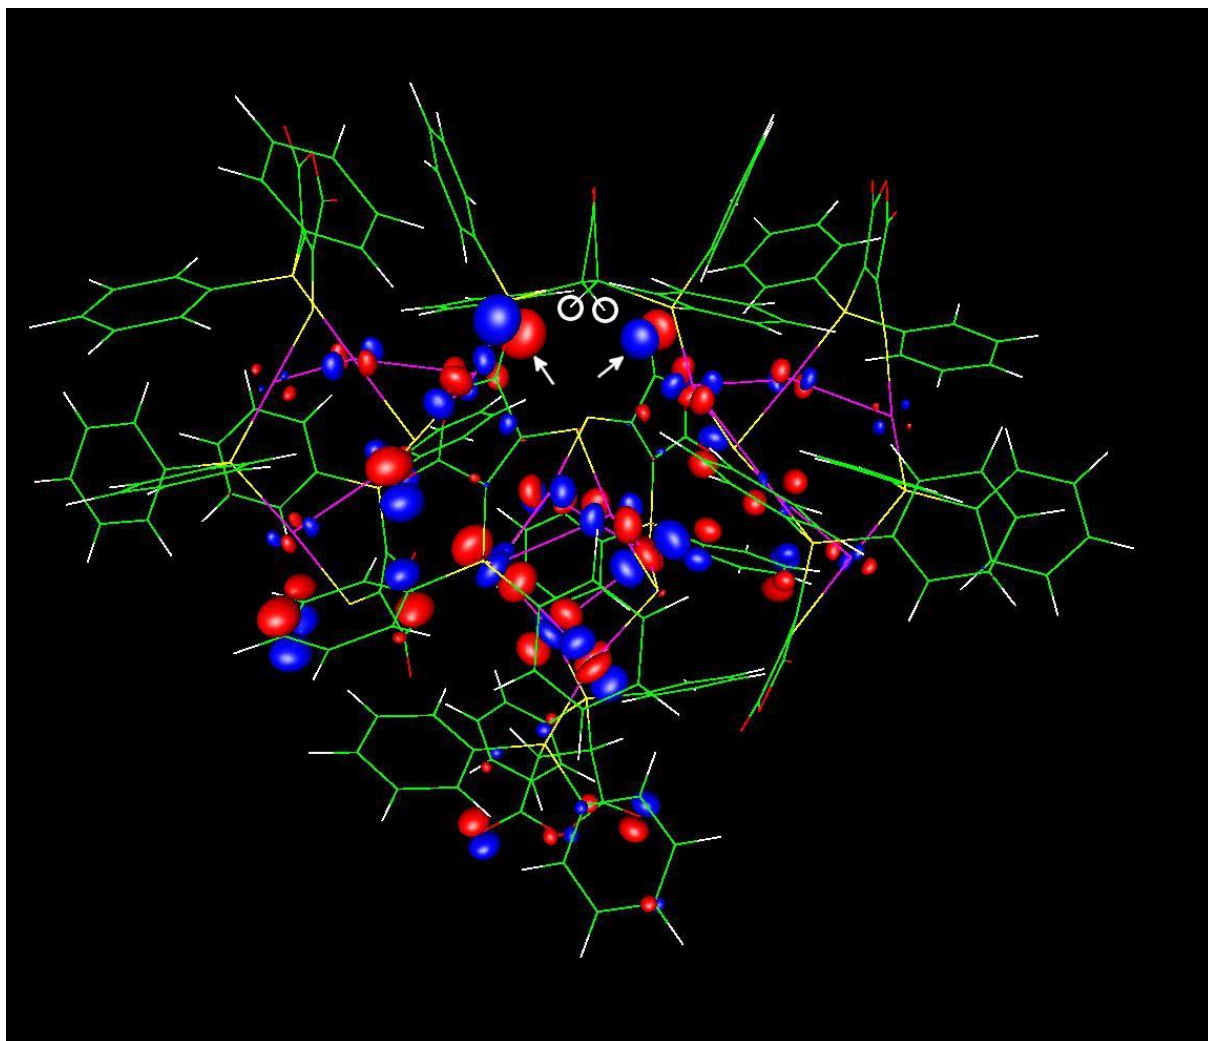

**Figure S4.** HOMO-81, -6.871 eV.

For reasons of clarity Figures 5–8 only show one of two possible LMOs. Due to the calculation in  $C_2$  symmetry they both become equivalent.

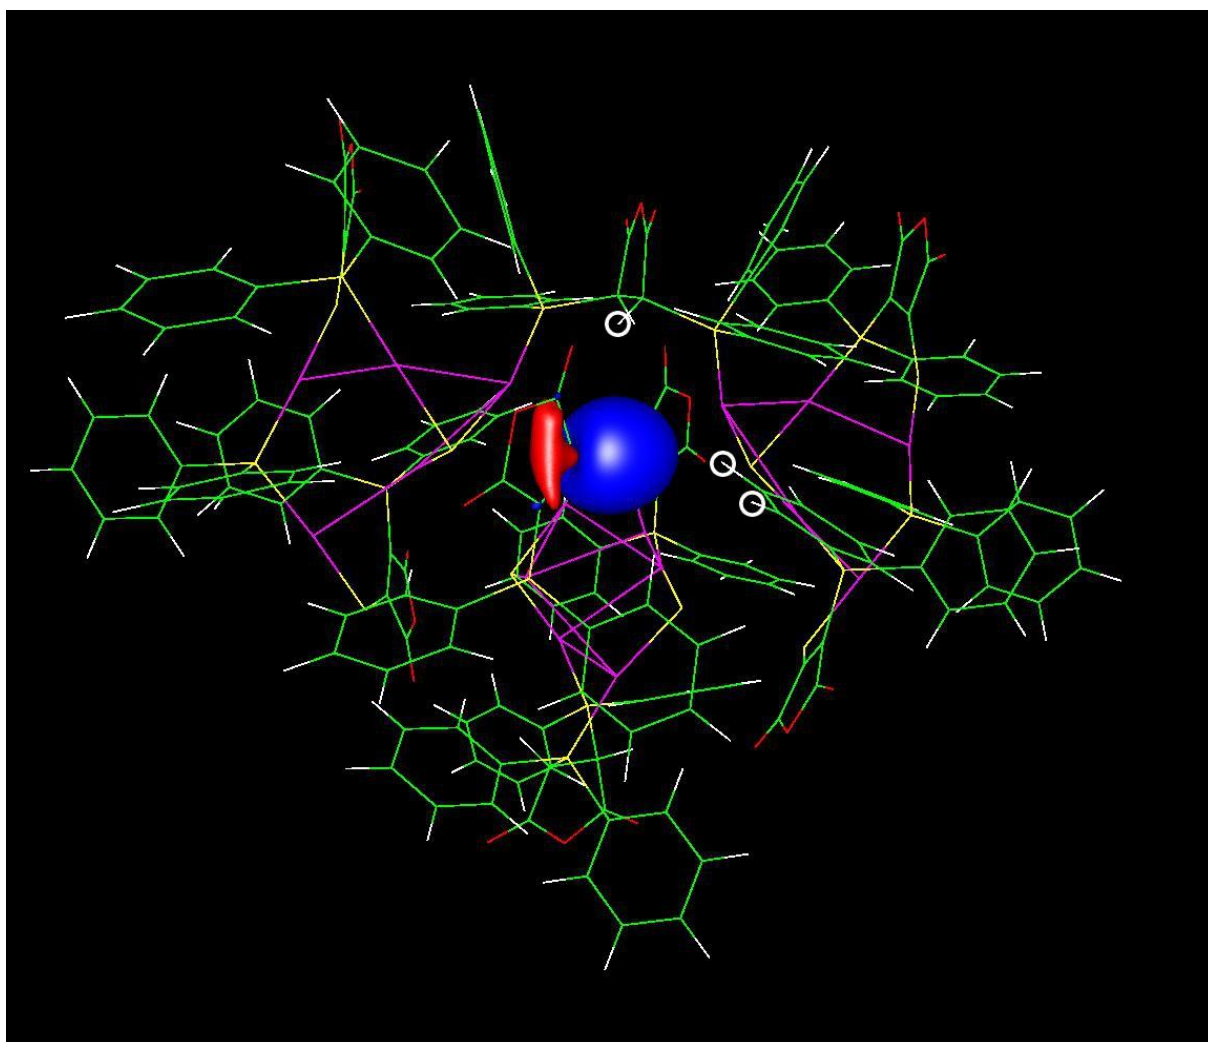

**Figure S5.** LMO 158

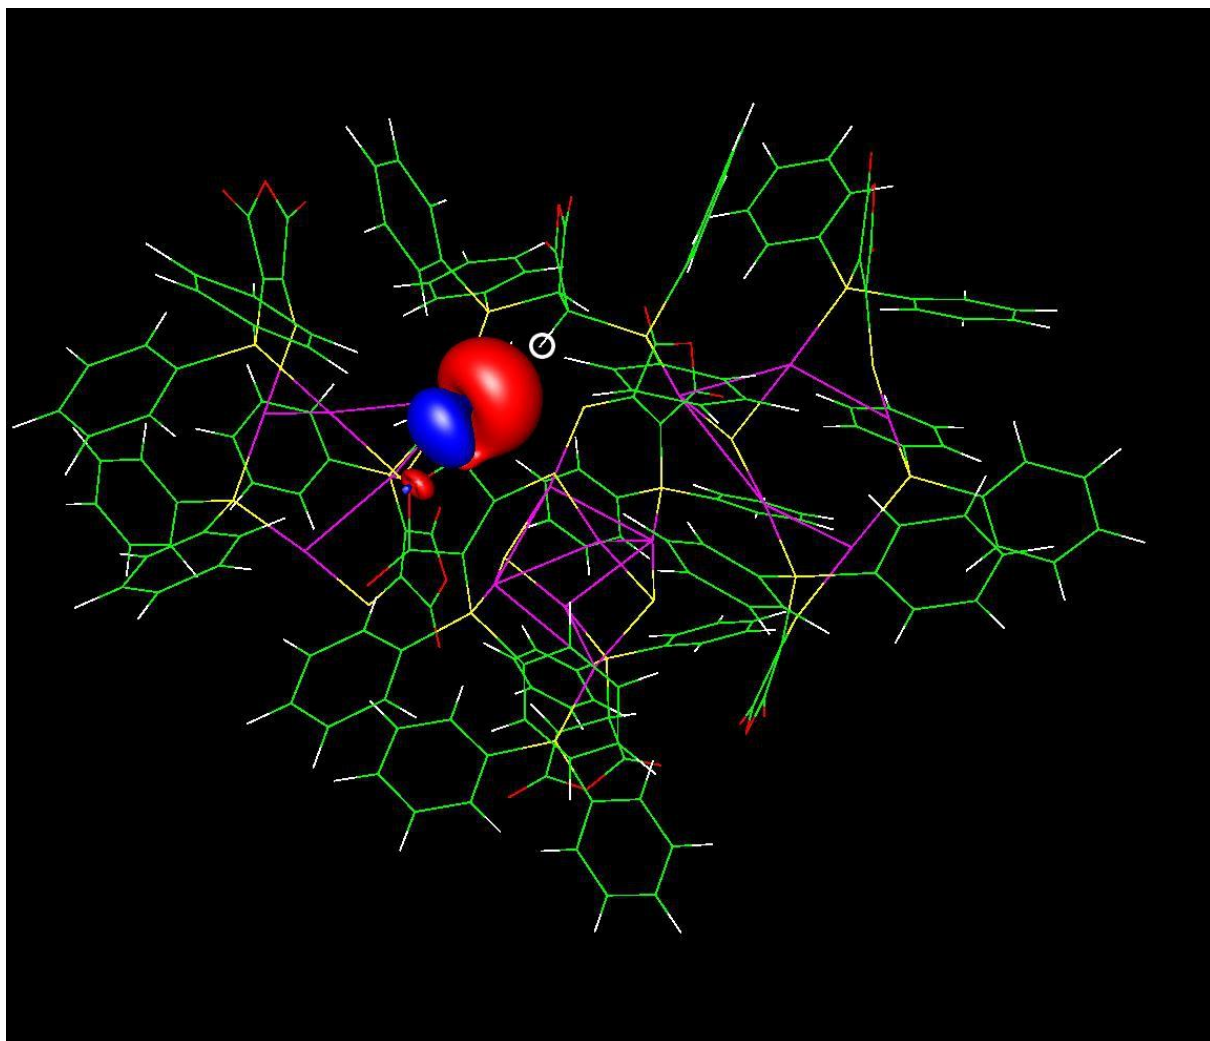

**Figure S6.** LMO 322



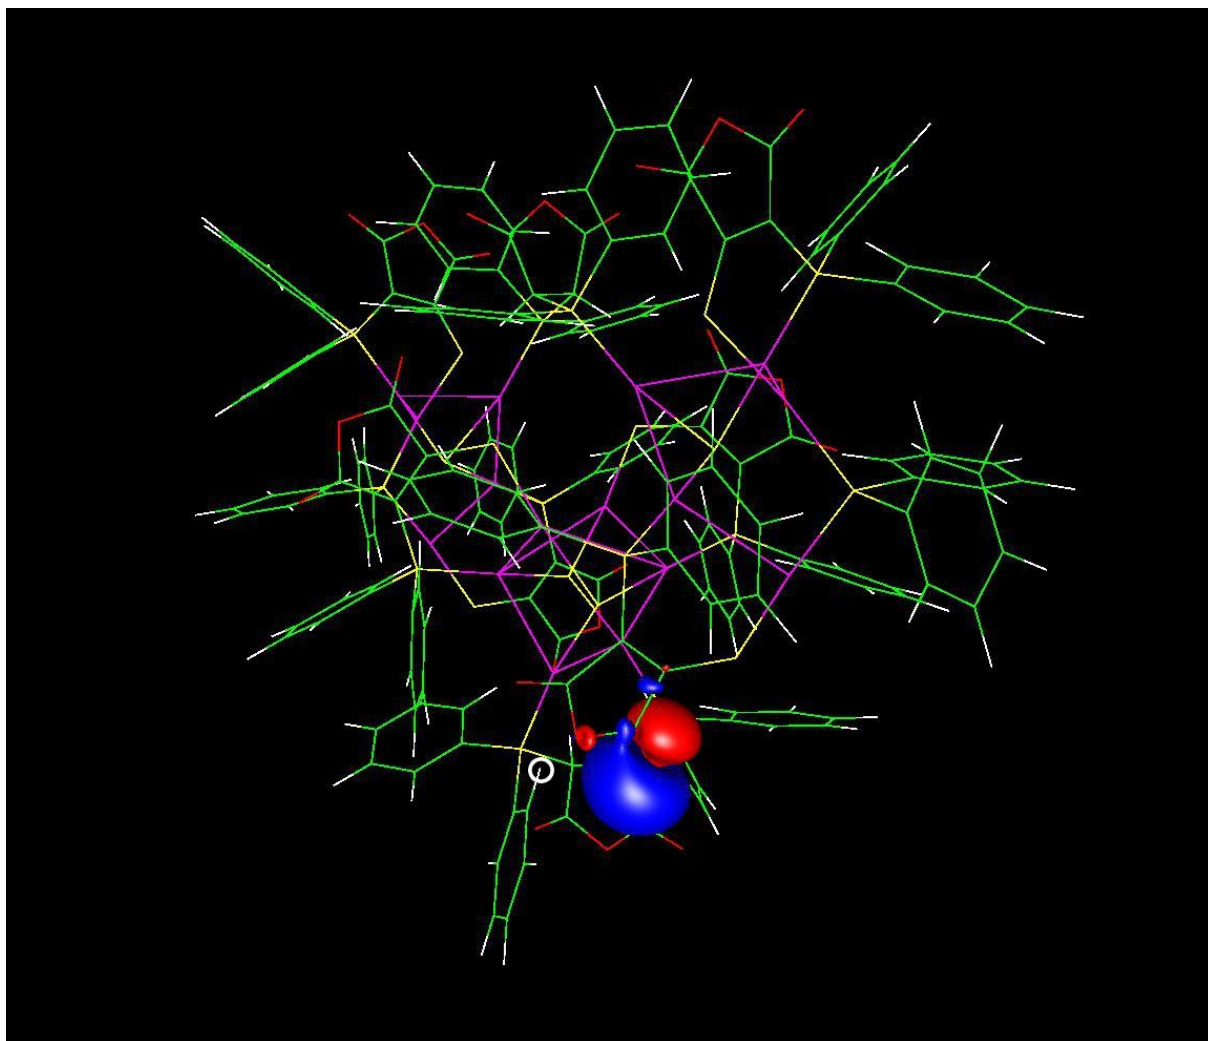

**Figure S7.** LMO 343



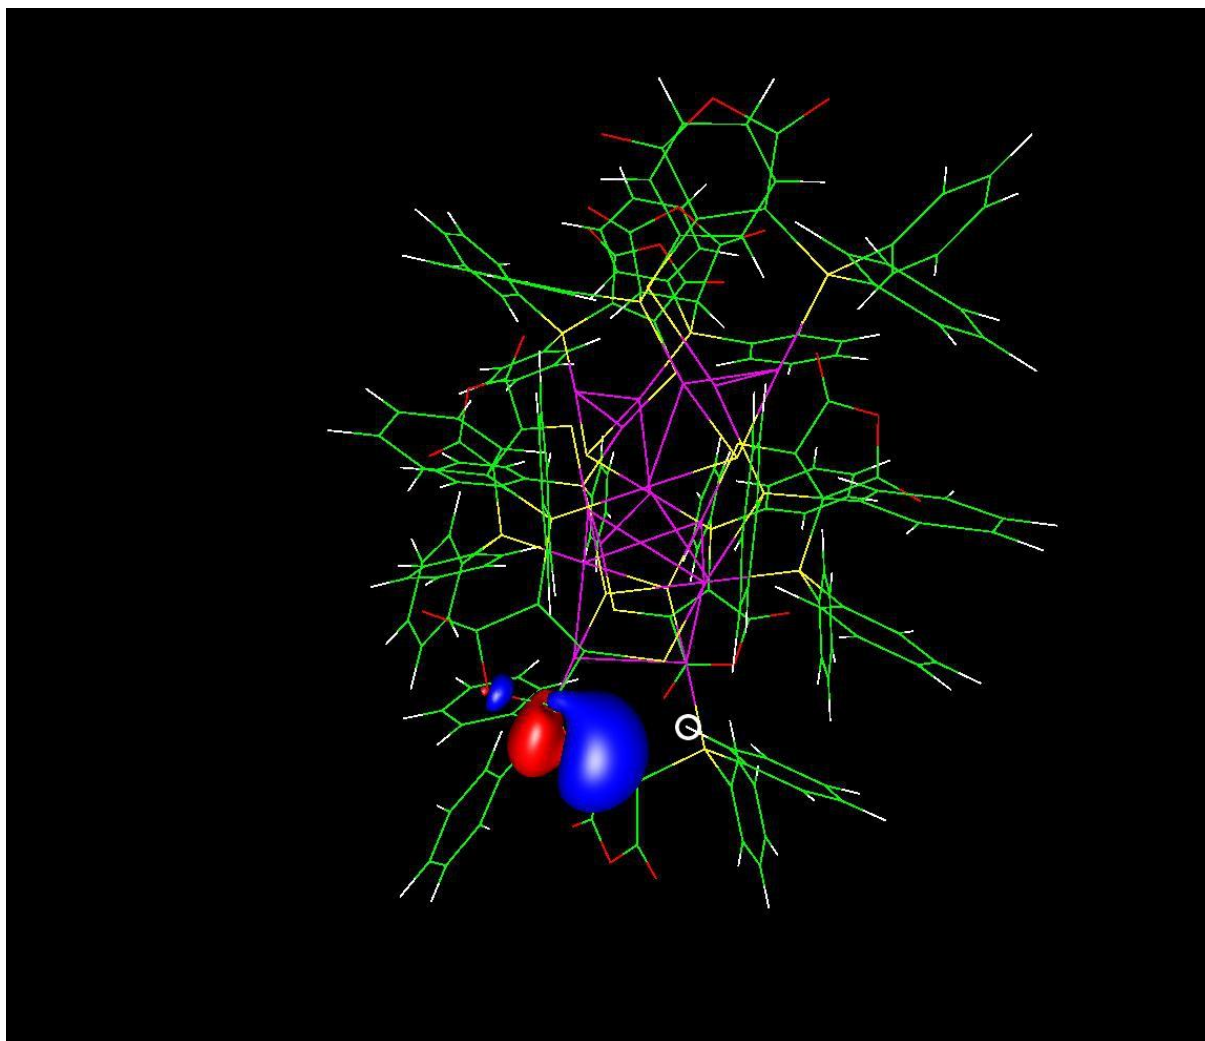

**Figure S8.** LMO 357

#### 4. References for the supporting information

- 1 a) D. Fenske, H. J. Becher, *Chem. Ber.* 1974, **107**, 117–122; b) D. Fenske, H. J. Becher, *Chem. Ber.* 1975, **108**, 2115–2123.
- 2 W. Yu, O. Fuhr, D. Fenske, *J. Cluster Sci.* 2012, **23**, 753–766.
- 3 H. Schmidt, H. Ruf, *Z. Anorg. Allg. Chem.* 1963, **321**, 270–273.
- 4 G. Sheldrick, *Acta Crystallogr., Sect. A*, 2008, **A64**, 112–122.
- 5 O.V. Dolomanov, L.J. Bourhis, R.J. Gildea, J.A.K. Howard and H. Puschmann, *OLEX2: A complete structure solution, refinement and analysis program, J. Appl. Cryst.*, 2009, **42**, 339–341.
- 6 Diamond - Crystal and Molecular Structure Visualization, Crystal Impact - Dr. H. Putz & Dr. K. Brandenburg GbR, Kreuzherrenstr. 102, 53227 Bonn, Germany, <http://www.crystalimpact.com/diamond>.

- 7 TURBOMOLE V6.5 2013, a development of University of Karlsruhe and  
Forschungszentrum Karlsruhe GmbH, 1989-2007, TURBOMOLE GmbH, since 2007;  
available from <http://www.turbomole.com>.
- 8 a) K. Eichkorn, O. Treutler, H. Öhm, M. Häser, R. Ahlrichs, *Chem. Phys. Lett.* **1995**,  
242, 652-660; b) K. Eichkorn, F. Weigend, O. Treutler, R. Ahlrichs, *Theor. Chim. Acta*  
**1997**, 97, 119-124.
- 9 S. Grimme, *J. Comp. Chem.* 2006, **27**, 1787-1799.
- 10 S. Grimme, J. Antony, S. Ehrlich, H. Krieg, *J. Chem. Phys* 2010, **132**, 154104.
- 11 S. Grimme, S. Ehrlich, L. Goerigk, *J. Comput. Chem.* 2011, **32**, 1456-1465.
- 12 F. Weigend, R. Ahlrichs, *Phys. Chem. Chem. Phys.* 2005, **7**, 3297-3305.
- 13 D. Andrae, U. Haeussermann, M. Dolg, H. Stoll, H. Preuss, *Theor. Chim. Acta* 1990,  
**77**, 123-141.
- 14 R. S. Mulliken, *J. Chem. Phys.* 1955, **23**, 1833-1840.
- 15 A. E. Reed, R. B. Weinstock, F. Weinhold, *J. Chem. Phys.* 1985, **83**, 735-746.
- 16 C. Ehrhardt, R. Ahlrichs, *Theor. Chim. Acta* 1985, **68**, 231-245.
- 17 S. F. Boys, in: P.-O. Löwdin (Ed.), *Quantum Theory of Atoms, Molecules and the  
Solid State*, Academic Press, New York 1966, 253-262.
- 18 G. Schaftenaar, J. H. Noordik, *J. Comput.-Aided Mol. Design* 2000, **14**, 123-134.
- 19 a) L. Laaksonen, *J. Mol. Graphics* 1992, **10**, 33-34; b) D. L. Bergmann, L. Laaksonen,  
A. Laaksonen, *J. Mol. Graphics Mod.* 1997, **15**, 301-306.
